# Supplementary material for: Mixed polymeric micelles as multifunctional scaffold for combined magnetic resonance imaging contrast enhancement and targeted chemotherapeutic drug delivery
Source: Royal Society of Chemistry journal article supplement (doi:10.1039/c2jm15092a), 2012-01-01
Supplement: c2jm15092a.pdf [file c2jm15092a.pdf]

## Supporting Information

### Mixed Polymeric Micelles as Multifunctional Scaffold for Combined Magnetic Resonance Imaging Contrast Enhancement and Targeted Chemotherapeutic Drug Delivery†

Tao Liu,<sup>a</sup> Yinfeng Qian,<sup>\*b</sup> Xianglong Hu,<sup>a</sup> Zhishen Ge,<sup>\*a</sup> and Shiyong Liu<sup>\*a</sup>

*CAS Key Laboratory of Soft Matter Chemistry, Hefei National Laboratory for Physical Sciences at the Microscale, Department of Polymer Science and Engineering, University of Science and Technology of China, Hefei, Anhui 230026, China, and The First Affiliated Hospital of Anhui Medical University, Hefei, Anhui 230022, China*

\* To whom correspondence should be addressed.

E-mail: sliu@ustc.edu.cn, liangminqyf@sohu.com, gezs@mail.ustc.edu.cn

<sup>a</sup> University of Science and Technology of China

<sup>b</sup> The First Affiliated Hospital of Anhui Medical University

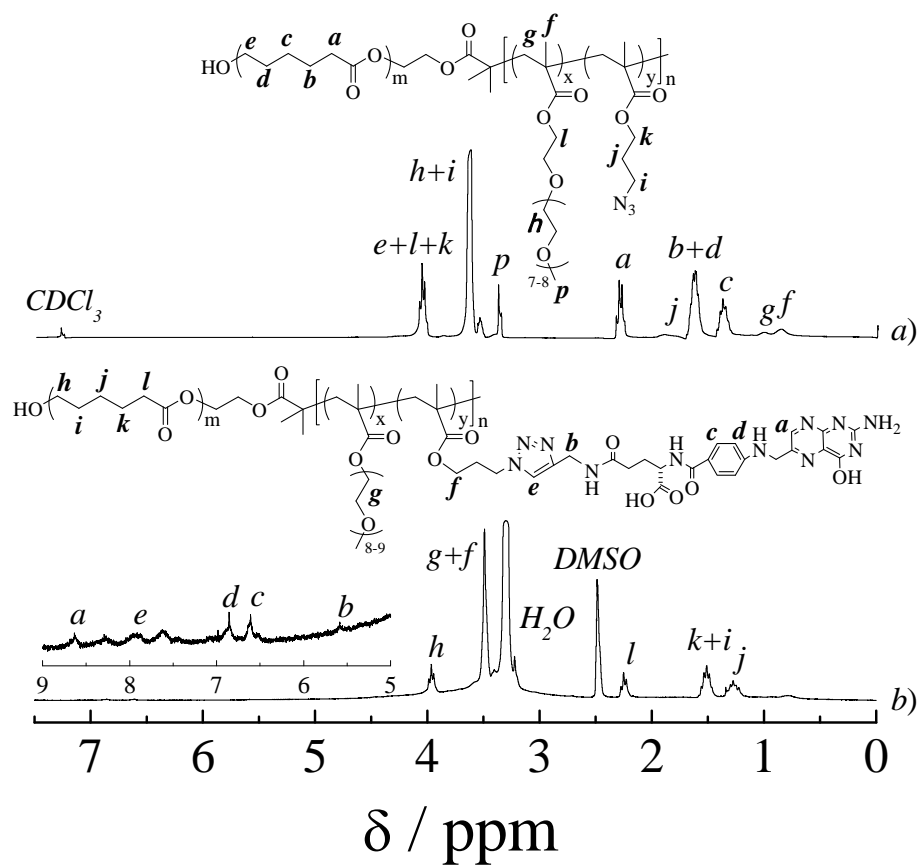

**Figure S1.**  $^1\text{H}$  NMR spectra recorded for amphiphilic diblock copolymers: (a)  $\text{PCL}_{64}\text{-}b\text{-P(OEGMA}_{0.83}\text{-co-AzPMA}_{0.17})_{18}$  in  $\text{CDCl}_3$  and (b)  $\text{PCL-}b\text{-P(OEGMA-FA)}$  in  $\text{DMSO-}d_6$ .

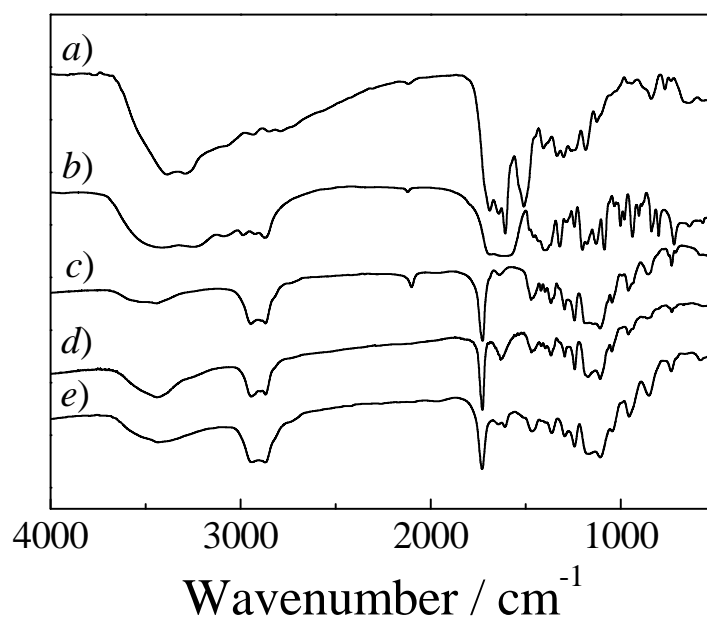

**Figure S2.** FT-IR spectra recorded for (a) *alkynyl-folate*, (b) *alkynyl-DOTA-Gd*, (c)  $\text{PCL}_{64}\text{-}b\text{-P(OEGMA}_{0.83}\text{-}co\text{-AzPMA}_{0.17})_{18}$ , (d)  $\text{PCL-}b\text{-P(OEGMA-Gd)}$ , and (e)  $\text{PCL-}b\text{-P(OEGMA-FA)}$ .

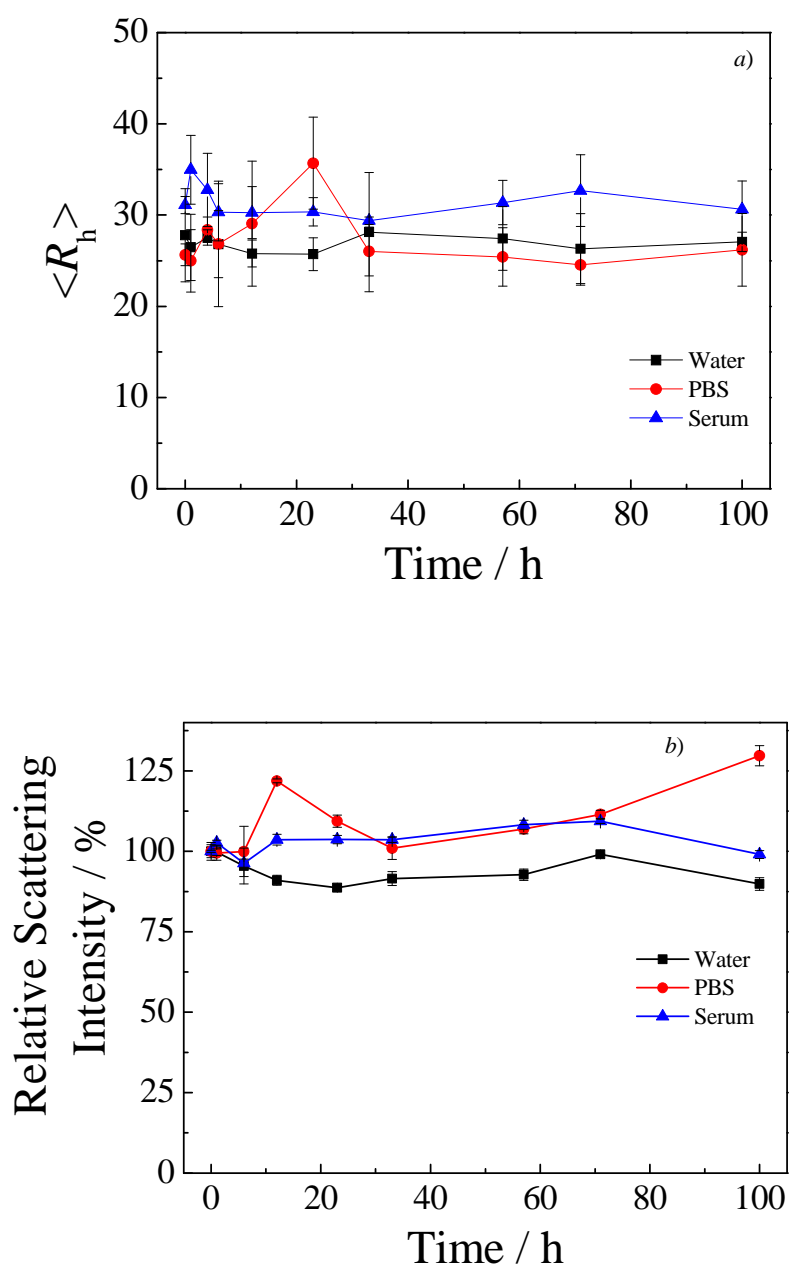

**Figure S3.** Variation of (a) intensity-average hydrodynamic radius and (b) relative scattering intensities of mixed micelles of PCL-*b*-P(OEGMA-*Gd*) and PCL-*b*-P(OEGMA-*FA*) (1/1, wt/wt) against extended storage duration at room temperature in water, PBS (0.02 M, pH 7.4), and PBS with 10% fetal bovine serum, respectively. Each experiment was done in quadruple and the data are shown as the mean value plus a standard deviation ( $\pm$  SD).
